# Supplementary material for: Subjective Perceptions of Occupational Fatigue in Community Pharmacists
Source: MDPI journal article supplement (doi:10.3390/pharmacy11030084), 2023-05-09
Supplement: s1 [file s1]

Supplementary Materials  
File S1: Pharmacist Fatigue Instrument

**Instructions:** When answering the next set of questions, think back over the days you worked the last two weeks (14 days).

Using the calendar below, please indicate the dates and times that you worked during the last two weeks.

| Sunday                                    | Monday | Tuesday | Wednesday | Thursday | Friday | Saturday |
|-------------------------------------------|--------|---------|-----------|----------|--------|----------|
| March 6<br><i>Example:</i><br>9 AM – 3 PM | 7      | 8       | 9         | 10       | 11     | 12       |
| 13                                        | 14     | 15      | 16        | 17       | 18     | 19       |
| 20                                        | 21     | 22      | 23        | 24       | 25     | 26       |
| 27                                        | 28     | 29      | 30        | 31       |        |          |

1. Thinking about the last two weeks... how many days did you work?

days

2. Thinking about the last two weeks... how many hours did you work most days?

hours

3. During the last two weeks, did you ever take a scheduled break during the workday? A scheduled break includes any paid or un-paid periods of time where you were not working, such as a lunch break.

- ☐ Yes  
☐ No

**Instructions:** Sometimes, pharmacists say that they feel different at various times of the workday, both physically and mentally. Think back over the days that you worked the last two weeks. When answering the questions think of the pharmacy you work in the most. To answer the questions, please mark the appropriate response on the scale.

**4. Think back over the days that you worked during the last two weeks when answering these questions. On how many workdays did you ...**

|                                                                                                                            | None of the<br>days you<br>worked | Less than<br>half of the<br>days you<br>worked | Half of the<br>days you<br>worked | More than<br>half of the<br>days you<br>worked | All of the<br>days you<br>worked |
|----------------------------------------------------------------------------------------------------------------------------|-----------------------------------|------------------------------------------------|-----------------------------------|------------------------------------------------|----------------------------------|
| <b>a.</b> Feel that your energy decreased over the course of the day?                                                      | <input type="radio"/>             | <input type="radio"/>                          | <input type="radio"/>             | <input type="radio"/>                          | <input type="radio"/>            |
| <b>b.</b> Feel more tired later in the day than you did at the beginning of the day?                                       | <input type="radio"/>             | <input type="radio"/>                          | <input type="radio"/>             | <input type="radio"/>                          | <input type="radio"/>            |
| <b>c.</b> Feel pain or discomfort anywhere in your body?                                                                   | <input type="radio"/>             | <input type="radio"/>                          | <input type="radio"/>             | <input type="radio"/>                          | <input type="radio"/>            |
| <b>d.</b> Have trouble thinking clearly at work, even for a short time?                                                    | <input type="radio"/>             | <input type="radio"/>                          | <input type="radio"/>             | <input type="radio"/>                          | <input type="radio"/>            |
| <b>e.</b> Have times where you forgot whether or not you had completed a task?                                             | <input type="radio"/>             | <input type="radio"/>                          | <input type="radio"/>             | <input type="radio"/>                          | <input type="radio"/>            |
| <b>f.</b> Have times where you spent longer completing a task later in the day than you would at the beginning of the day? | <input type="radio"/>             | <input type="radio"/>                          | <input type="radio"/>             | <input type="radio"/>                          | <input type="radio"/>            |
| <b>g.</b> Have times where you felt that you could not keep up with your work?                                             | <input type="radio"/>             | <input type="radio"/>                          | <input type="radio"/>             | <input type="radio"/>                          | <input type="radio"/>            |
| <b>h.</b> Have times where you felt more impatient later in the day than you did at the beginning of the day?              | <input type="radio"/>             | <input type="radio"/>                          | <input type="radio"/>             | <input type="radio"/>                          | <input type="radio"/>            |
| <b>i.</b> Have times where you felt that you were not performing at your best?                                             | <input type="radio"/>             | <input type="radio"/>                          | <input type="radio"/>             | <input type="radio"/>                          | <input type="radio"/>            |
| <b>j.</b> Find it necessary to take short-cuts when providing patient care?                                                | <input type="radio"/>             | <input type="radio"/>                          | <input type="radio"/>             | <input type="radio"/>                          | <input type="radio"/>            |
| <b>k.</b> Have times where you felt that you were not able to go above and beyond standard patient care?                   | <input type="radio"/>             | <input type="radio"/>                          | <input type="radio"/>             | <input type="radio"/>                          | <input type="radio"/>            |
| <b>l.</b> Have times where you felt generally fatigued?                                                                    | <input type="radio"/>             | <input type="radio"/>                          | <input type="radio"/>             | <input type="radio"/>                          | <input type="radio"/>            |

**5. Consider the last two weeks. At the end of most workdays, how tired did you feel?**

- ☐ Not at all tired
- ☐ A little tired
- ☐ Somewhat tired
- ☐ Very tired
- ☐ Extremely tired

**Instructions:** The next few questions ask about your thoughts on pharmacist fatigue **in general**, not just about your personal experiences.

**6. Consider your thoughts in general, not just your personal experiences.**

|                                                                                                                  | Not at all            | A little              | Some                  | Quite a bit           | A great deal          |
|------------------------------------------------------------------------------------------------------------------|-----------------------|-----------------------|-----------------------|-----------------------|-----------------------|
| <b>a.</b> In general, how much do you think pharmacist fatigue affects patient safety?                           | <input type="radio"/> |
| <b>b.</b> In general, how concerned are you about fatigue in pharmacists?                                        | <input type="radio"/> |
| <b>c.</b> How much do you think scheduled breaks during the workday would help pharmacists to cope with fatigue? | <input type="radio"/> |

**Thank you so much for taking the time to complete this survey.  
Your thoughts and opinions are extremely important to us!**

**Table S1: Qualitative Codebook**

| Name                 | Description                                                                                                                         |
|----------------------|-------------------------------------------------------------------------------------------------------------------------------------|
| Coping Mechanisms    | Methods pharmacist list as helping to “cope” with or deal with feelings of occupational fatigue                                     |
| Distal Outcomes      |                                                                                                                                     |
| Organization         | Quality, Retention & Turnover, Profit                                                                                               |
| Patient              | Patient Safety, Experience                                                                                                          |
| Person               | Burnout, Wellbeing, Health, Safety                                                                                                  |
| Occupational Fatigue |                                                                                                                                     |
| Active Fatigue       | Overstimulation, High Cognitive Work, Overload, Continuous and Prolonged Demands                                                    |
| Passive Fatigue      | Under stimulation, Low Cognitive Work, Underload                                                                                    |
| Mental Fatigue       | Lack of Motivation, Sleepiness, Trouble Concentrating or “Fuzzy” Feeling when Working                                               |
| Physical Fatigue     | Physical Exertion, Physical Discomfort, General Lack of Energy                                                                      |
| Structure & Process  |                                                                                                                                     |
| External Environment | Factors that the pharmacy or pharmacy organization are unable to change (e.g., insurance payers, COVID-19 pandemic, policy)         |
| Organization         | Teamwork, Culture, Policies, and Procedures, Training, Staffing                                                                     |
| Person               | Experience and Training, Knowledge, Personal Demographics or External Activities                                                    |
| Physical Environment | Physical Layout, Noise, Lighting, Temperature                                                                                       |
| Tasks                | Activities that pharmacists complete as part of their daily work (e.g., checking prescriptions, administering vaccines, counseling) |
| Tools & Technology   | Resources available to the pharmacist to help complete tasks and meet work demands (e.g., pharmacy dispensing system)               |
